## LABORATORY INVESTIGATIONS

Anesthesiology  
78:510-523, 1993  
© 1993 American Society of Anesthesiologists, Inc.  
J. B. Lippincott Company, Philadelphia

# Transmural Redistribution of Myocardial Blood Flow during Isoflurane Anesthesia and Its Effects on Regional Myocardial Function in a Canine Model of Fixed Coronary Stenosis

Niall C. T. Wilton, M.R.C.P., F.F.A.R.C.S.,\* Paul R Knight, M.D., Ph.D.,† Kathleen Ullrich, B.S.,‡  
Bradley Martin, B.S.,‡ Kim P. Gallagher, Ph.D.§

**Background:** The effects of isoflurane on the transmural distribution of myocardial blood flow distal to an acute critical coronary stenosis and the relationship between the changes in regional blood flow and function were studied to determine whether isoflurane can produce a transmural "steal" phenomenon and to assess the role of this phenomenon in producing changes in regional myocardial function.

**Methods:** After production of acute critical coronary stenosis under baseline chloralose and fentanyl anesthesia, the animals were exposed to increasing end-tidal concentrations of isoflurane (0.7%, 1.4%, and 2.1%) without control of the hemodynamic parameters. At 2.1% isoflurane, the blood pressure then was restored to the baseline level by administration of phenylephrine. Changes in the following parameters were assessed: global contractility (measured by changes in pressure with time), regional myocardial function (assessed by systolic wall thickening and measured by sonomicrometers), transmural distribution of myocardial perfusion (measured by the radioactive microsphere method), and regional oxygen consumption and extraction.

**Results:** Distal to the critical stenosis, a transmural redistribution of myocardial blood flow (endocardial-epicardial ratio < 1) occurred with all concentrations of isoflurane. With higher concentrations (1.4% and 2.1%), a significant decrease in subendocardial blood flow occurred only in the presence of hemodynamic changes and was restored by phenylephrine. In this area, changes in regional myocardial function correlated most strongly with changes in subendocardial perfusion ( $y = -0.17 + 1.70x - 0.58x^2$ ,  $r^2 = 0.90$ ). In the stenotic region,

oxygen extraction remained stable, but oxygen consumption decreased in parallel with reductions in regional myocardial function. In the normal region, oxygen consumption did not change, but oxygen extraction decreased with increasing isoflurane concentrations.

**Conclusions:** These results show that isoflurane is a coronary vasodilator able to induce a transmural redistribution of myocardial blood flow distal to an acute critical coronary stenosis. A true transmural steal, however, was not produced reliably in the absence of hemodynamic changes, suggesting that isoflurane either is only a moderate vasodilator, or that the decrease in subendocardial blood flow is offset by the negative inotropic action of the drug. When regional myocardial dysfunction distal to a severe coronary stenosis occurs, this correlates with decreasing subendocardial blood flow during isoflurane anesthesia, suggesting ischemia as the cause. (Key words: Anesthetics, volatile: isoflurane. Arteries, coronary: steal. Heart: coronary hemodynamics; coronary steal; myocardial oxygen consumption; coronary artery stenosis; regional myocardial performance.)

ISOFLURANE causes coronary and systemic vasodilatation and impairment of coronary blood flow autoregulation.<sup>1-3</sup> In the presence of coronary stenosis severe enough to vasodilate distal arterioles maximally, isoflurane may produce ischemia by reducing arterial perfusion pressure.<sup>4,5</sup> Because subendocardial flow reserve is lost at higher perfusion pressures than is subepicardial flow reserve, subendocardial blood flow may be reduced even if subepicardial blood flow is increased, the condition described as transmural coronary steal.<sup>6,7</sup> This effect is particularly noticeable with drugs that have a predominant effect on small coronary vessels, the proposed site of action of isoflurane.<sup>8,9</sup> A reduction of myocardial blood flow distal to a stenosed coronary artery can lead to myocardial dysfunction when the oxygen supply to that part of the myocardium becomes inadequate to meet its metabolic needs.<sup>10,11</sup> Within the myocardium, changes in regional myocardial dysfunction correlate closely with reductions in subendocardial blood flow in both anesthetized and conscious dogs.<sup>12,13</sup>

\* Assistant Professor.

† Professor.

‡ Research Assistant.

§ Adjunct Associate Professor.

Received from the Anesthesiology Research Laboratory, Department of Anesthesiology, and the Department of Physiology, University of Michigan Medical School, Ann Arbor, Michigan. Accepted for publication November 11, 1992. Dr. Gallagher is the recipient of National Institutes of Health research development award K04HL04120 (Bethesda, Maryland).

Address reprint requests to Dr. Wilton: Department of Anesthesiology, UCSD Medical Center-8770, 225 Dickinson Street, San Diego, California 92103-8770.

## ISOFLURANE, SUBENDOCARDIAL FLOW, AND TRANSMURAL FUNCTION

Effects of isoflurane and halothane on coronary vascular resistance and collateral myocardial blood flow: Their capacity to induce coronary steal. *ANESTHESIOLOGY* 67:665-675, 1987

28. Hartman JC, Kampine JP, Schmeling WT, Warltier DC: Alterations in collateral blood flow produced by isoflurane in a chronically instrumented canine model of multivessel coronary artery disease. *ANESTHESIOLOGY* 74:120-133, 1991

29. Hartman JC, Kampine JP, Schmeling WT, Warltier DC: Steal-prone coronary circulation in chronically instrumented dogs: Isoflurane *versus* adenosine. *ANESTHESIOLOGY* 74:744-756, 1991

30. Theroux P, Franklin D, Ross J, Kemper WS: Regional myocardial function during acute coronary artery occlusion and its modification by pharmacologic agents in the dog. *Circ Res* 35:896-908, 1974

31. Housmans PR, Murat I: Comparative effects of halothane, enflurane and isoflurane at equipotent anesthetic concentrations on isolated ventricular myocardium of the ferret: 1. Contractility. *ANESTHESIOLOGY* 69:451-463, 1988

32. Priebe HJ: Isoflurane causes more severe regional myocardial dysfunction than halothane in dogs with a critical coronary artery stenosis. *ANESTHESIOLOGY* 69:72-83, 1988

33. Mayer N, Zimpfer M, Steinbereithner K: Isoflurane impairs the function of ischemic myocardium in acutely but not in chronically instrumented dogs. *Anesth Analg* 73:16-24, 1991

34. Braunwald E, Klooner RA: The stunned myocardium: Pro-

longed, post-ischemic ventricular dysfunction. *Circulation* 50:1146-1149, 1982

35. Buffington CW, Coyle RJ: Altered load dependence of post-ischemic myocardium. *ANESTHESIOLOGY* 75:464-474, 1991

36. Holzgrefe HH, Everitt JM, Wright EM: Alpha-chloralose as a canine anesthetic. *Lab Anim Sci* 37:587-594, 1987

37. Arndt JO, Mikat M, Parasher C: Fentanyl's analgesic, respiratory, and cardiovascular actions in relation to dose and plasma concentration in unanesthetized dogs. *ANESTHESIOLOGY* 61:355-361, 1984

38. Philbin DM, Foëx P, Drummond G, Lowenstein E, Ryder WA, Jones LA: Postsystolic shortening of canine left ventricle supplied by a stenotic coronary artery when nitrous oxide is added in the presence of narcotics. *ANESTHESIOLOGY* 62:166-174, 1985

39. Salisbury PF, Cross CE, Rieben PA: Acute ischemia of inner layers of ventricular wall. *Am Heart J* 66:650-656, 1963

40. Dunn RB, Griggs DM: Ventricular filling pressure as a determinant of coronary blood flow during ischemia. *Am J Physiol* 244:H429-H436, 1983

41. Chiariello M, Ribeiro LGT, Davis MA, Maroko PR: "Reverse coronary steal" induced by coronary vasoconstriction following coronary occlusion in dogs. *Circulation* 56:809-815, 1977

42. Nathan HJ, Feigl EO: Adrenergic vasoconstriction lessons transmural steal during coronary hypoperfusion. *Am J Physiol* 250:H645-H653, 1986
